# Supplementary material for: Decreased Innate Migration of Pro-Inflammatory M1 Macrophages through the Mesothelial Membrane Is Affected by Ceramide Kinase and Ceramide 1-P
Source: MDPI journal article supplement (doi:10.3390/ijms232415977), 2022-12-15
Supplement: s1 [file s1]

**Table S1: Summary of 45 measured cytokines, chemokines and growth factors' sensitivity, Lower and Upper Limit of Quantification (LLOQ, ULOQ).**

\*IL-4, IL-13 and IFN $\gamma$  were excluded from data analysis because they were added into culture for macrophage polarization.

| Cytokine       | Sensitivity | LLOQ        | ULOQ         | Detected? | Excluded from analysis* |
|----------------|-------------|-------------|--------------|-----------|-------------------------|
| BDNF           | 1.02 pg/mL  | 0.93pg/mL   | 10000 pg/mL  | Yes       |                         |
| EGF            | 0.85 pg/mL  | 2.08 pg/mL  | 12000 pg/mL  | Yes       |                         |
| Eotaxin        | 1.4 pg/mL   | 0.61 pg/mL  | 2500 pg/mL   | Yes       |                         |
| FGF-2          | 2.47 pg/mL  | 1.14 pg/mL  | 20000 pg/mL  | Yes       |                         |
| GM-CSF         | 1.2 pg/mL   | 17.09 pg/mL | 70000 pg/mL  | No        |                         |
| GRO $\alpha$   | 2.8 pg/mL   | 2.44 pg/mL  | 10000 pg/mL  | Yes       |                         |
| HGF            | 3.10 pg/mL  | 8.59 pg/mL  | 36000 pg/mL  | Yes       |                         |
| IFN $\alpha$   | 0.2 pg/mL   | 0.61 pg/mL  | 2500 pg/mL   | Yes       |                         |
| IFN $\gamma$   | 0.2 pg/mL   | 10.69 pg/mL | 50000 pg/mL  | Yes       | Yes                     |
| IL-1RA         | 17.8 pg/mL  | 34.18 pg/mL | 140000 pg/mL | Yes       |                         |
| IL-1 $\alpha$  | 0.1 pg/mL   | 0.57 pg/mL  | 2500 pg/mL   | Yes       |                         |
| IL-1 $\beta$   | 0.2 pg/mL   | 2.08 pg/mL  | 10000 pg/mL  | Yes       |                         |
| IL-2           | 0.8 pg/mL   | 4.48 pg/mL  | 20000 pg/mL  | Yes       |                         |
| IL-4           | 1.5 pg/mL   | 10.98 pg/mL | 50000 pg/mL  | No        | Yes                     |
| IL-5           | 0.3 pg/mL   | 4.72 pg/mL  | 30000 pg/mL  | Yes       |                         |
| IL-6           | 0.4 pg/mL   | 9.6 pg/mL   | 40000 pg/mL  | Yes       |                         |
| IL-7           | 0.2 pg/mL   | 0.31 pg/mL  | 2500 pg/mL   | Yes       |                         |
| IL-8           | 1.2 pg/mL   | 2.44 pg/mL  | 10000 pg/mL  | Yes       |                         |
| IL-9           | 0.5 pg/mL   | 9.77 pg/mL  | 40000 pg/mL  | Yes       |                         |
| IL-10          | 0.1 pg/mL   | 2.29 pg/mL  | 10000 pg/mL  | Yes       |                         |
| IL-12p70       | 0.04 pg/mL  | 6.28 pg/mL  | 28000 pg/mL  | Yes       |                         |
| IL-13          | 0.1 pg/mL   | 2.44 pg/mL  | 10000 pg/mL  | No        | Yes                     |
| IL-15          | 1.1 pg/mL   | 2.06 pg/mL  | 12500 pg/mL  | Yes       |                         |
| IL-17A         | 0.1 pg/mL   | 1.69 pg/mL  | 10000 pg/mL  | No        |                         |
| IL-18          | 0.4 pg/mL   | 8.88 pg/mL  | 40000 pg/mL  | Yes       |                         |
| IL-21          | 0.6 pg/mL   | 9.61 pg/mL  | 40000 pg/mL  | Yes       |                         |
| IL-22          | 8.2 pg/mL   | 31.74 pg/mL | 130000 pg/mL | Yes       |                         |
| IL-23          | 0.9 pg/mL   | 14.59 pg/mL | 60000 pg/mL  | Yes       |                         |
| IL-27          | 5.1 pg/mL   | 15.3 pg/mL  | 100000 pg/mL | Yes       |                         |
| IL-31          | 3.3 pg/mL   | 14.17 pg/mL | 80000 pg/mL  | Yes       |                         |
| IP-10          | 0.3 pg/mL   | 1.95 pg/mL  | 8000 pg/mL   | Yes       |                         |
| LIF            | 0.83 pg/mL  | 5.53 pg/mL  | 25000 pg/mL  | Yes       |                         |
| MCP-1          | 0.6 pg/mL   | 1.22 pg/mL  | 5000 pg/mL   | Yes       |                         |
| MIP-1 $\alpha$ | 1.1 pg/mL   | 2.14 pg/mL  | 8750 pg/mL   | No        |                         |
| MIP-1 $\beta$  | 4.7 pg/mL   | 6.10 pg/mL  | 25000 pg/mL  | No        |                         |
| NGF $\beta$    | 6.19 pg/mL  | 7.32 pg/mL  | 30000 pg/mL  | Yes       |                         |
| RANTES         | 0.2 pg/mL   | 0.61 pg/mL  | 2500 pg/mL   | Yes       |                         |
| PDGF-BB        | 6.01 pg/mL  | 1.94 pg/mL  | 30000 pg/mL  | Yes       |                         |
| PIGF-1         | 0.23 pg/mL  | 0.71 pg/mL  | 5000 pg/mL   | Yes       |                         |
| SCF            | 0.57 pg/mL  | 1.37 pg/mL  | 6500 pg/mL   | Yes       |                         |
| SDF-1 $\alpha$ | 20.5 pg/mL  | 17.09 pg/mL | 70000 pg/mL  | Yes       |                         |
| TNF $\alpha$   | 0.4 pg/mL   | 7.8 pg/mL   | 35000 pg/mL  | Yes       |                         |
| TNF $\beta$    | 1.6 pg/mL   | 1.34 pg/mL  | 25000 pg/mL  | Yes       |                         |
| VEGF-A         | 1.73 pg/mL  | 5.86 pg/mL  | 24000 pg/mL  | Yes       |                         |

|        |            |             |             |     |
|--------|------------|-------------|-------------|-----|
| VEGF-D | 0.88 pg/mL | 12.21 pg/mL | 50000 pg/mL | Yes |
|--------|------------|-------------|-------------|-----|

**Table S2: Fold change ratio of cytokines between macro**

| <b>Cytokine</b> | <b>M1/M0</b> | <b>M2/M0</b> | <b>M2/M1</b> |
|-----------------|--------------|--------------|--------------|
| BDNF            | 1.31         | 1.36         | 1.04         |
| EGF             | 0.84         | 0.81         | 0.97         |
| Eotaxin         | 0.95         | 0.81         | 0.85         |
| FGF-2           | 2.54         | 0.88         | 0.35         |
| GRO- $\alpha$   | 0.12         | 0.076        | 0.62         |
| HGF             | 1.23         | 0.62         | 0.51         |
| IFN $\alpha$    | 1.24         | 1.2          | 0.96         |
| IL-1RA          | 1.18         | 0.93         | 0.79         |
| IL-1 $\alpha$   | 1.22         | 0.56         | 0.46         |
| IL-1 $\beta$    | 13.89        | 2.3          | 0.17         |
| IL-2            | 1.56         | 0.91         | 0.58         |
| IL-21           | 4.61         | 0.34         | 0.07         |
| IL-22           | 2.35         | 0.51         | 0.22         |
| IL-23           | 27.14        | 0.29         | 0.01         |
| IL-27           | 1.34         | 0.78         | 0.58         |
| IL-31           | 2.08         | NA           | NA           |
| IL-5            | 1.72         | 4.91         | 2.86         |
| IL-6            | 1.65         | 0.56         | 0.34         |
| IL-7            | 2.74         | 0.32         | 0.12         |
| IL-8            | 0.48         | 1.19         | 2.50         |
| IL-9            | 0.82         | 0.41         | 0.50         |
| IL-10           | 0.02         | 0.63         | 30.30        |
| IL12p70         | 16.27        | 1.39         | 0.09         |
| IL-15           | 1.9          | 0.53         | 0.28         |
| IL-18           | 38.51        | 224.97       | 5.88         |
| IP-10           | 1.37         | 0.66         | 0.48         |
| LIF             | 4.28         | 14.09        | 3.33         |
| MCP-1           | 0.85         | 0.82         | 0.96         |
| NGF $\beta$     | 0.96         | 1.24         | 1.30         |
| PDGF-BB         | 10.31        | 17.68        | 1.72         |
| PIGF-1          | 1.06         | 0.81         | 0.76         |
| RANTES          | 0.64         | 1.12         | 1.75         |
| SCF             | 1.36         | 1.72         | 1.27         |
| SDF-1 $\alpha$  | 0.83         | 0.62         | 0.75         |
| TNF- $\alpha$   | 30.02        | 2.12         | 0.07         |
| TNF- $\beta$    | 9.46         | 0.13         | 0.01         |
| VEGF-A          | 0.86         | 1.29         | 1.52         |
| VEGF-D          | 0.49         | 0.67         | 1.37         |

**A**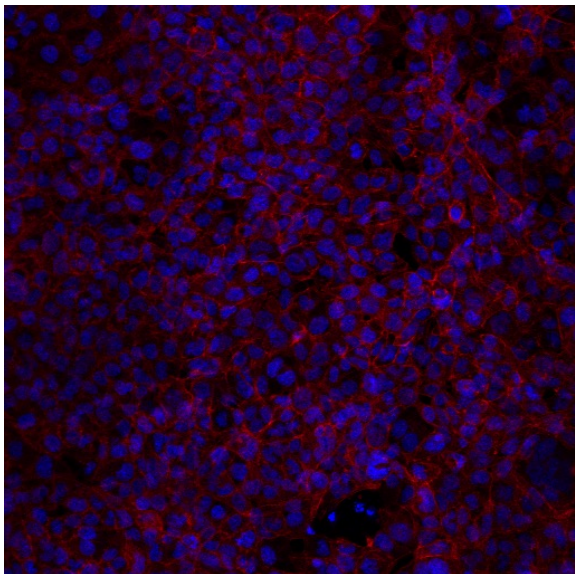**B**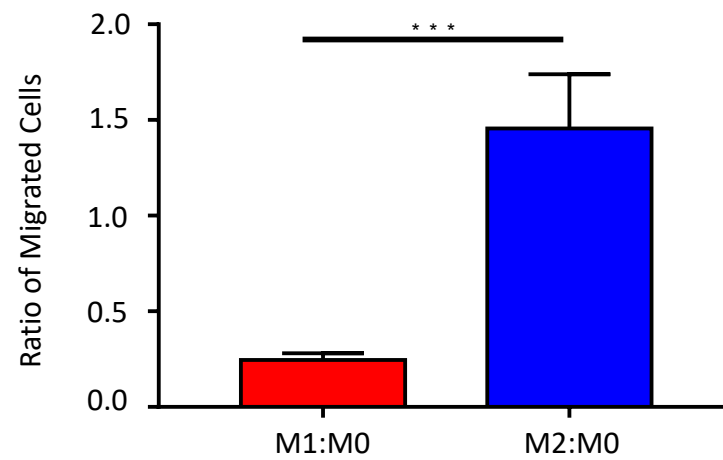**C**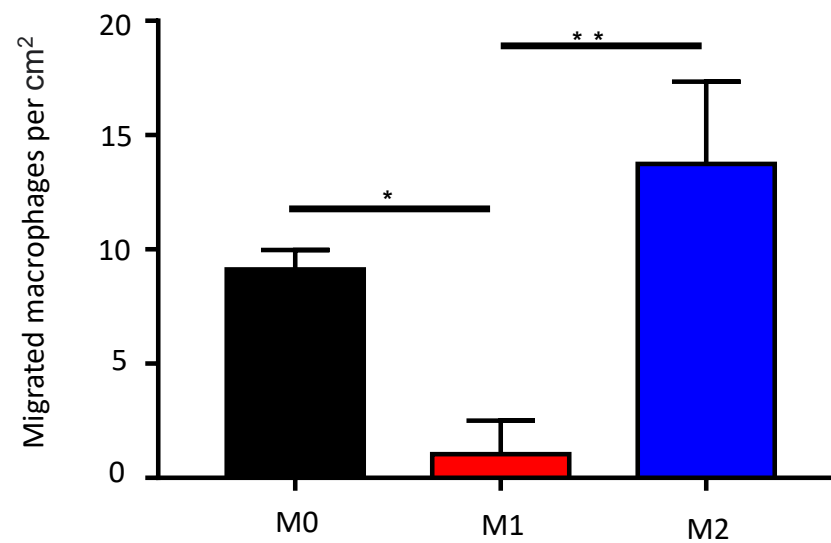

Figure S1. \*,  $p < 0.05$ , \*\*,  $p < 0.01$ ,  
\*\*\*,  $p < 0.005$

**A**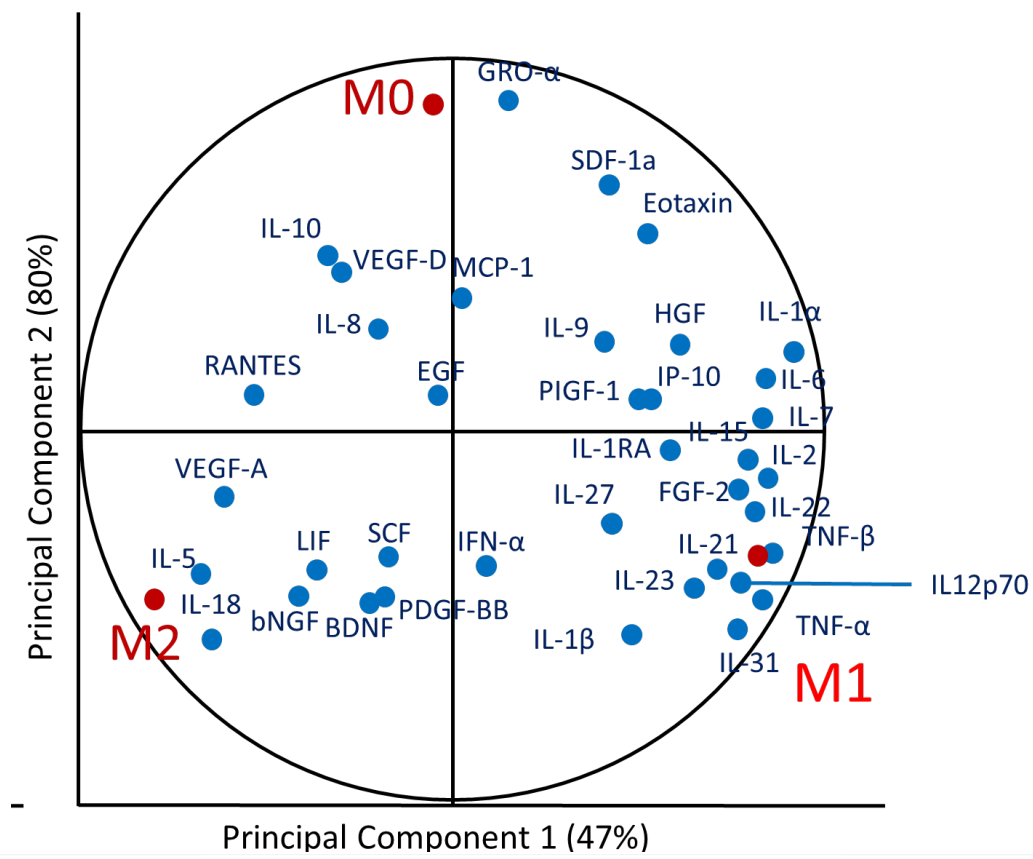**B**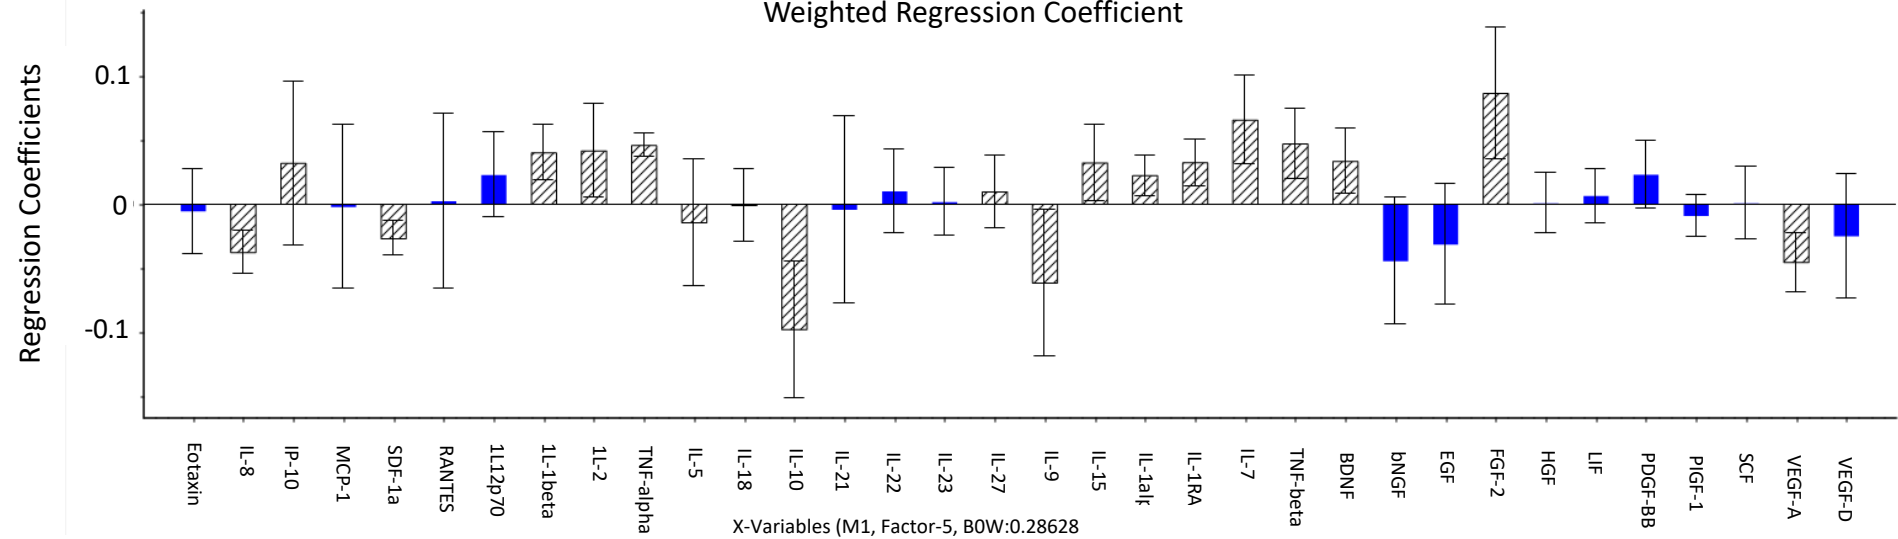

**A**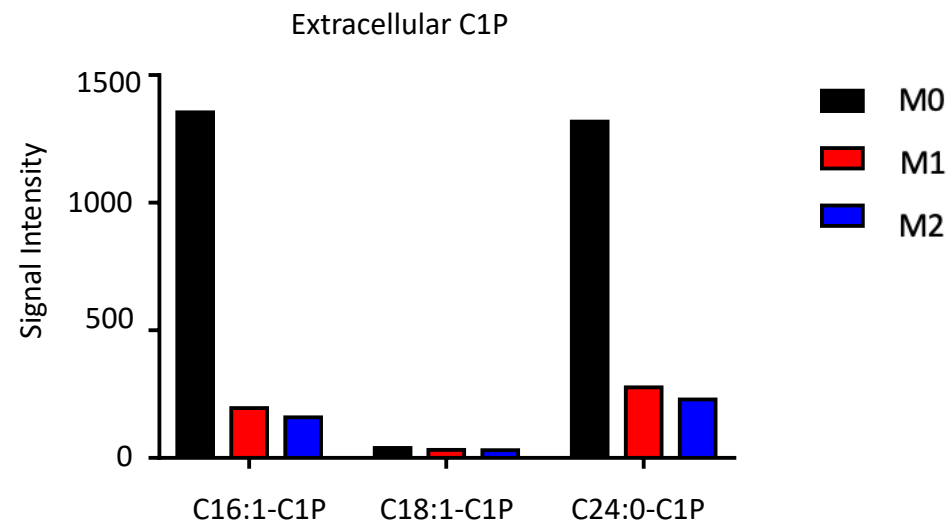**B**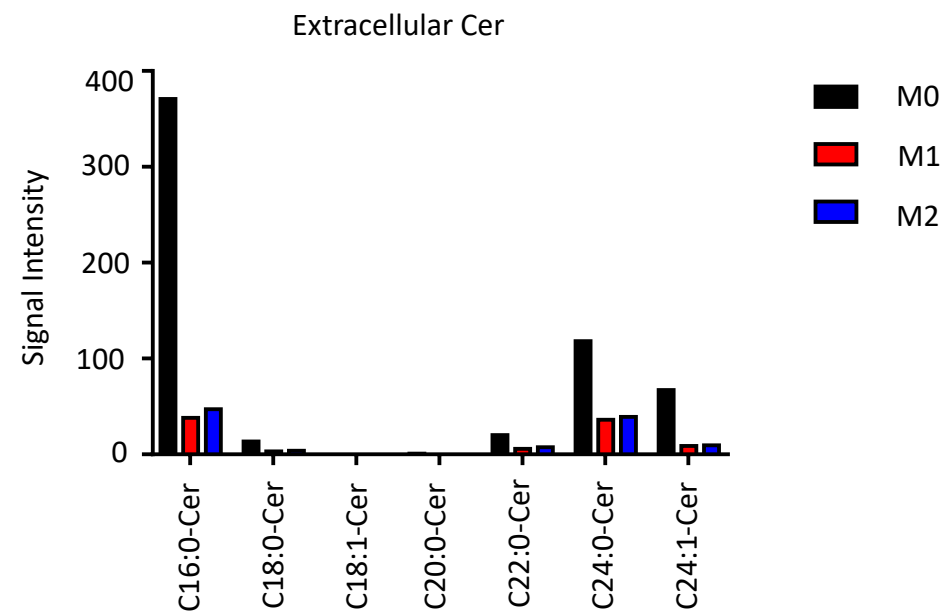**C**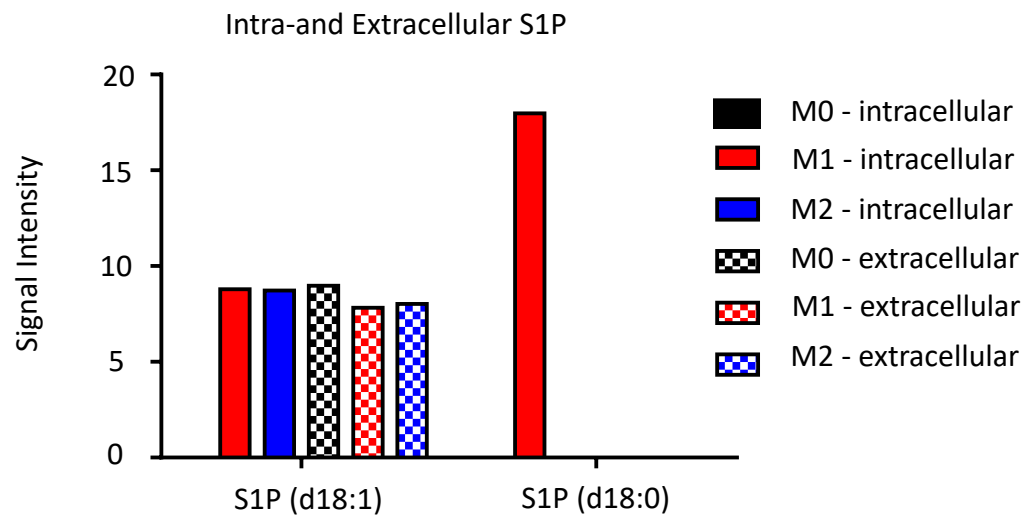

Figure S3

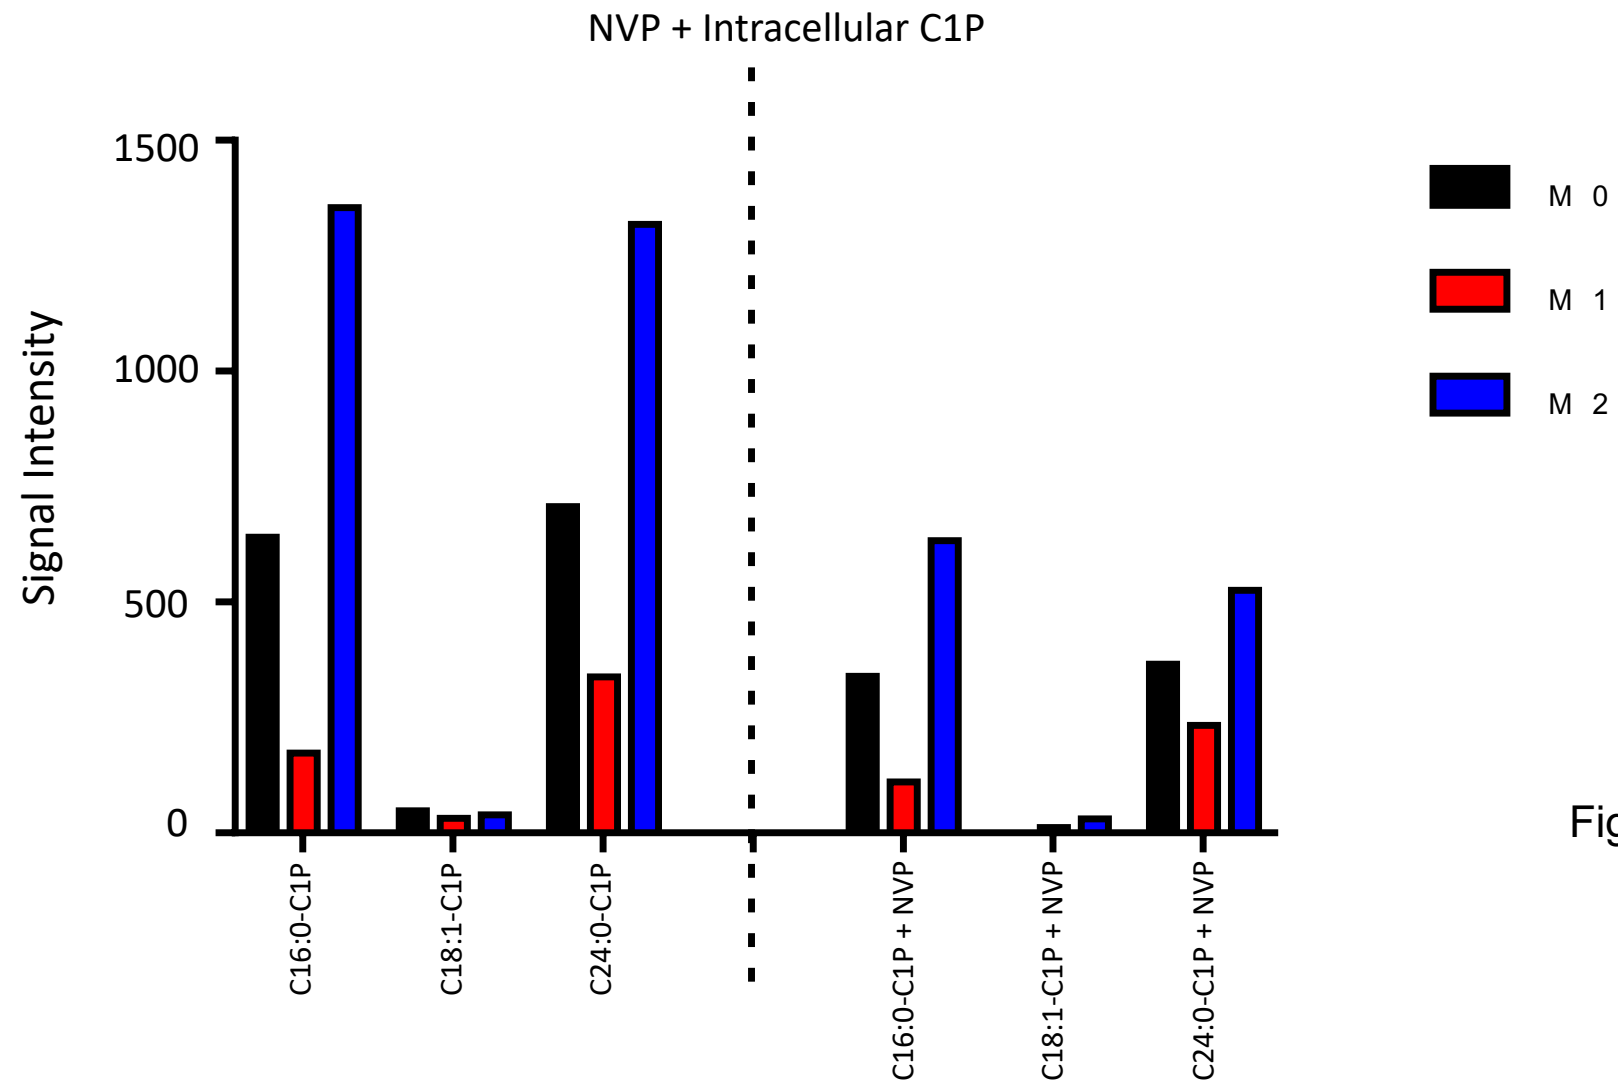

Figure S4
